# Supplementary material
Source: PubMed Central journal article supplement (PMC5512444)

## Data Set 2 : Cluster 1

**Revival of  $\mu$ s-ms dynamics upon RING binding** (related to Figure 6 and Table S3).  $R_2$  relaxation dispersion profile for  $[^2\text{H}, ^{15}\text{N}]$ -Ube2g2:RING-G2BR (unlabeled) complex at 1.5°C. Data was measured at  $^1\text{H}$  frequencies of 900 MHz (red) and 700 MHz (blue). The residues are clustered as described in Table S3.

*Dispersion profile of residues in cluster 1.*

### Cluster 1

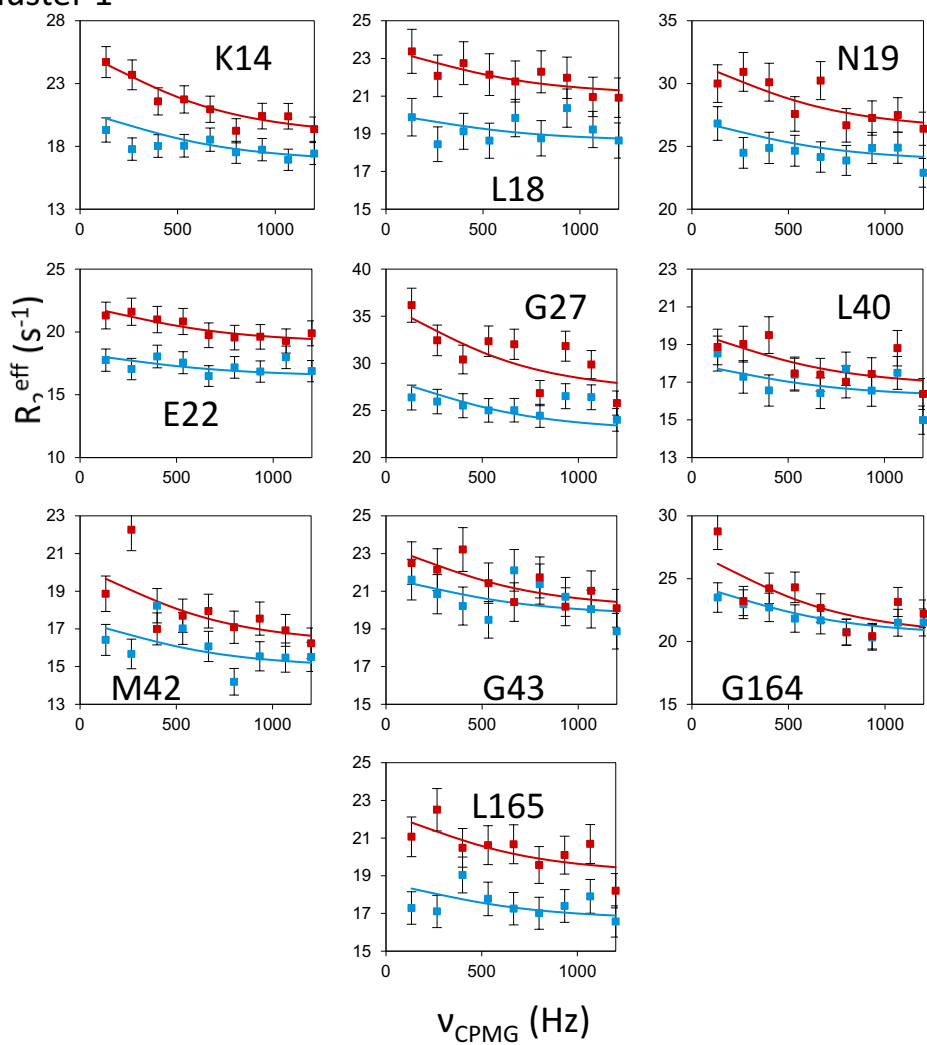

## Data Set 2 : Cluster 2

**Revival of  $\mu$ s-ms dynamics upon RING binding** (related to Figure 6 and Table S3).  $R_2$  relaxation dispersion profile for [ $^2\text{H}, ^{15}\text{N}$ ]-Ube2g2:RING-G2BR (unlabeled) complex at 1.5°C. Data was measured at  $^1\text{H}$  frequencies of 900 MHz (red) and 700 MHz (blue). The residues are clustered as described in Table S3.

*Dispersion profile of residues in cluster 2.*

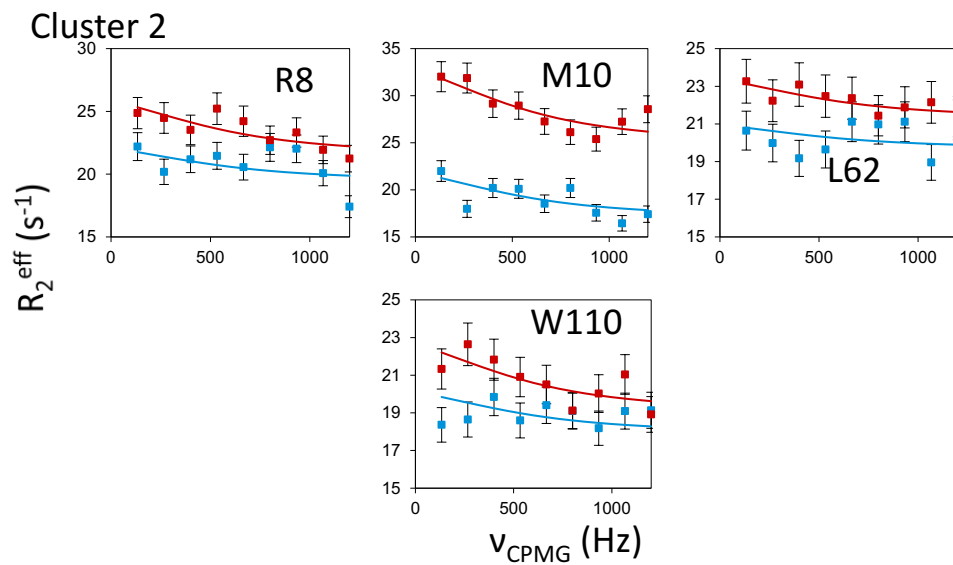

## Data Set 2 : Cluster 3

**Revival of  $\mu$ s-ms dynamics upon RING binding** (related to Figure 6 and Table S3).  $R_2$  relaxation dispersion profile for  $[^2\text{H}, ^{15}\text{N}]$ -Ube2g2:RING-G2BR (unlabeled) complex at 1.5°C. Data was measured at  $^1\text{H}$  frequencies of 900 MHz (red) and 700 MHz (blue). The residues are clustered as described in Table S3.

*Dispersion profile of residues in cluster 3.*

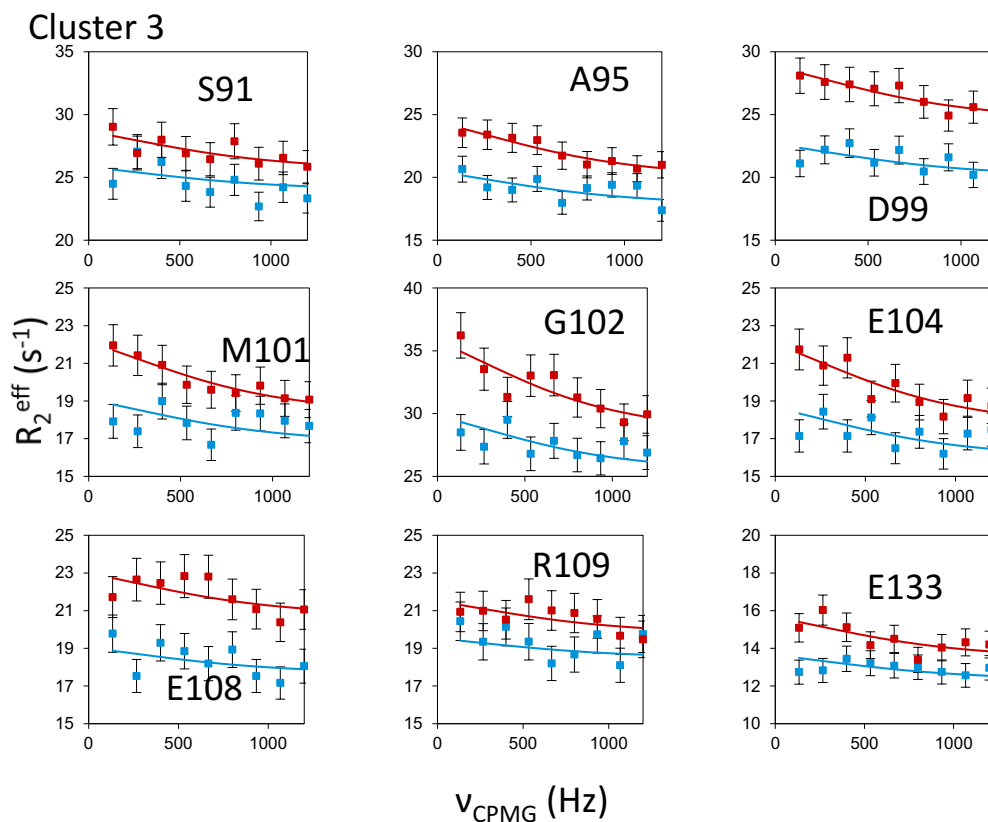

## Data Set 2 : Cluster 4

**Revival of  $\mu$ s-ms dynamics upon RING binding** (related to Figure 6 and Table S3).  $R_2$  relaxation dispersion profile for  $[^2\text{H}, ^{15}\text{N}]$ -Ube2g2:RING-G2BR (unlabeled) complex at 1.5°C. Data was measured at  $^1\text{H}$  frequencies of 900 MHz (red) and 700 MHz (blue). The residues are clustered as described in Table S3.

*Dispersion profile of residues in cluster 4.*

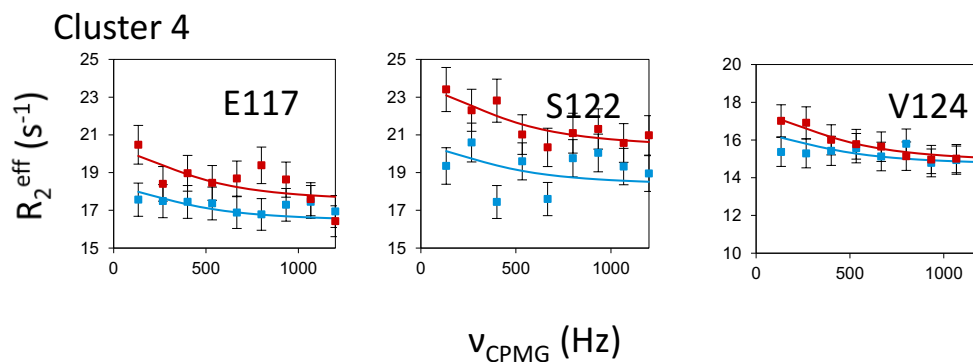

Supplement: NIHMS864993-supplement-3.pdf [file NIHMS864993-supplement-3.pdf]
